# Supplementary figures and images for: Effects of glucokinase haploinsufficiency on the pancreatic β‐cell mass and function of long‐term high‐fat, high‐sucrose diet‐fed mice
Source: PubMed Central journal article supplement — J Diabetes Investig. 2024 Sep 21;15(12):1732–42. doi: 10.1111/jdi.14307 (PMC11615693; doi:10.1111/jdi.14307), 2024-09-21

# Supplementary Figure 2

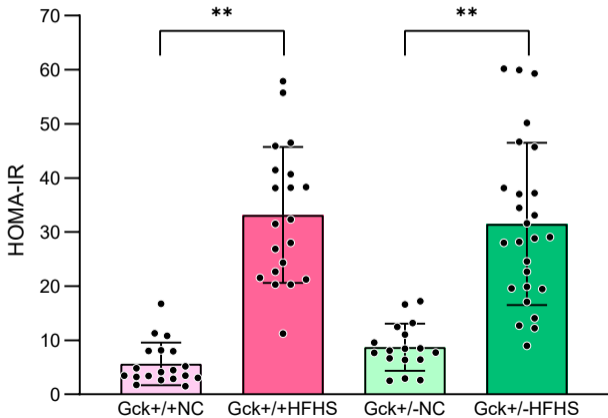

Supplement: JDI-15-1732-s001.pdf [file JDI-15-1732-s001.pdf]

# Supplementary Figure 4

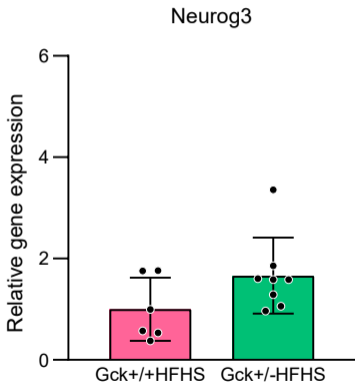

Supplement: JDI-15-1732-s002.pdf [file JDI-15-1732-s002.pdf]

# Supplementary Figure 3

a

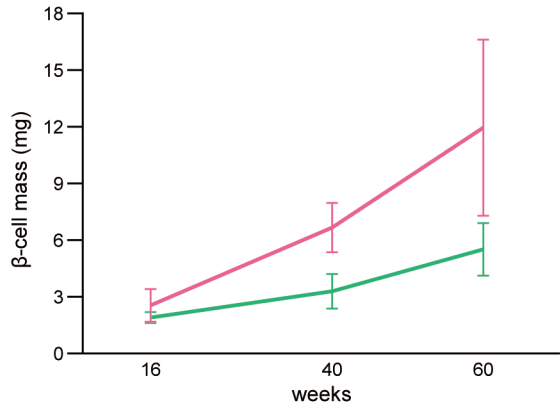

b

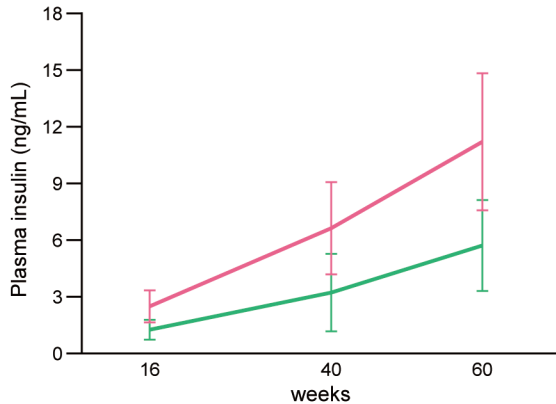

Supplement: JDI-15-1732-s003.pdf [file JDI-15-1732-s003.pdf]

# Supplementary Figure 1

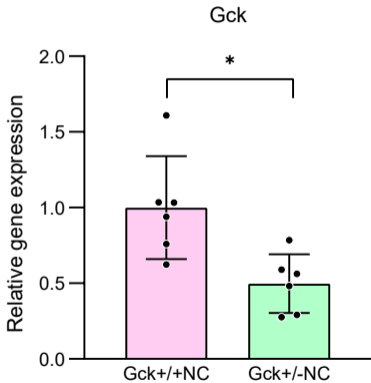

Supplement: JDI-15-1732-s005.pdf [file JDI-15-1732-s005.pdf]
